# Supplementary material for: The E2F family as potential biomarkers and therapeutic targets in colon cancer
Source: PeerJ. 2020 Feb 19;8:e8562. doi: 10.7717/peerj.8562 (PMC7035869; doi:10.7717/peerj.8562)
Supplement: Supplemental Information 2 [file peerj-08-8562-s002.xlsx]

## Sheet: Sheet1
E2F1	1	2	3	4	5	6	7	8	9	10	11	12	13	14	15	16	17	18	19	20	21	22	23	24	25	26	27	28	29	30	31	32
Adj	6.545	6.545	6.991	7.321	7	6.094	8.546	6.434	3.4	4.1	6.545	7.543	6.565	6.567	4.596	12.42	5.873	5.663	6.903	6.434	7.09	7.434	6.565	6.554	6.092	4.34	9.54	6.003	7.503	6.938	6.425	6.091
Carci	1	1.23	1.002	1.331	1.096	0.509	0.248	0.563	1.637	2.391	1.389	1.23	1.209	1.118	0.982	2.212	1.094	1.882	1.321	0.004	1.42	1.003	1.3	1.402	1.22	1.096	2.114	2.091	2.091	1.095	1.647	1.002
E2F2	1	2	3	4	5	6	7	8	9	10	11	12	13	14	15	16	17	18	19	20	21	22	23	24	25	26	27	28	29	30	31	32
Adj	4.232	3.234	3.421	3.902	4.343	4.391	5.2	2.193	4.32	4.092	4.304	5.34	3.4533	6.567	6.45	3.533	4.345	5.342	3.422	5.434	3.21	4.321	4.309	3.049	3.209	4.345	1.53	3.235	5.353	5.34	3.095	2.093
Carci	1	1.093	2.019	0.564	0.598	2.124	3.212	2.111	2.321	2.093	2.093	1.293	2.093	1.092	0.234	0.667	1.2	2.133	2.009	2.109	1.093	1.209	1.115	1.092	1.092	1.002	1.945	0.998	3.098	1.098	1.263	1.119
E2F3	1	2	3	4	5	6	7	8	9	10	11	12	13	14	15	16	17	18	19	20	21	22	23	24	25	26	27	28	29	30	31	32
Adj	4,.454	3.565	4.59	5.609	4.93	4.344	3.982	4.992	2.398	4.983	5.983	3.982	5.982	6.982	2.983	3.983	4.204	5.928	2.934	5.498	6.983	7.298	5.983	1.982	2.345	3.213	2.498	5.309	4.985	3.092	2.398	3.094
Carci	1	1.397	1.294	1.408	0.497	6.435	6.523	1	7.463	1.398	1.002	1.084	0.874	0.879	0.545	0.499	4.342	5.473	6598	4.,509	4.985	11.23	4.983	5983	1.093	0.887	1.928	1.298	1.983	1.084	1.093	0.932
E2F4	1	2	3	4	5	6	7	8	9	10	11	12	13	14	15	16	17	18	19	20	21	22	23	24	25	26	27	28	29	30	31	32
Adj	5.352	4.589	5.395	6.384	4.837	5.093	4.394	5.903	3.045	2.893	7.593	4.823	5.904	4.094	5.876	5.039	3.094	3.984	6.432	5.904	5.093	5932	9.098	3.452	5.634	12.334	11.984	5.432	4.903	3.245	4.009	7.453
Carci	5.903	5.029	6.583	8.795	6.938	6.374	7.097	4.837	4.839	4.822	7.903	5.893	6.385	6.382	4.321	6.092	5.389	5.332	9.383	4.104	5.353	5.351	6.093	9.345	2.422	3.198	3.295	3.583	7.384	6.392	6.565	4.543
E2F5	1	2	3	4	5	6	7	8	9	10	11	12	13	14	15	16	17	18	19	20	21	22	23	24	25	26	27	28	29	30	31	32
Adj	8.223	6.756	9.443	10.345	11.434	5.676	4.567	6.786	6.029	5.029	11.234	3.598	9.985	6.395	6.039	8.093	6.4	4.092	6.24	11.24	11.983	3.095	2.4985	1.308	0.874	0	14.345	14.522	6.677	8.091	2.409	2.095
Carci	4.802	4.309	3.408	3.977	7.095	5.093	1.398	5.039	4.092	6.092	3.094	9.092	2.309	4.245	5.353	11.231	14.092	10.982	2.092	3.209	2.309	7.353	4.093	6.245	5.24	6.241	8.209	5.242	4.091	1.233	1.093	1.873
E2F6	1	2	3	4	5	6	7	8	9	10	11	12	13	14	15	16	17	18	19	20	21	22	23	24	25	26	27	28	29	30	31	32
Adj	6.545	4.095	8.093	20.029	11.209	3.234	2.45	5.209	3.109	5.205	2.445	4.059	5.096	3.503	7.304	3.982	5.999	4.093	5.093	5.093	4.029	4.092	4.092	4.013	8.093	5.983	6.093	5.672	5.987	7.342	4.983	5.983
Carci	6.893	7.564	3.565	4.564	5.092	5.352	4.092	3.092	5.453	4.093	2.091	6.706	8.787	6.309	5.984	9.948	0.984	9.845	9.875	9.002	3.988	4.984	5.988	3.984	3.984	4.983	6.985	4.983	5.983	7.983	5.984	5.983
E2F7	1	2	3	4	5	6	7	8	9	10	11	12	13	14	15	16	17	18	19	20	21	22	23	24	25	26	27	28	29	30	31	32
Adj	6.958	5.938	5.096	8.094	7.094	8.99	9.874	5.984	6.984	8.874	8.885	5.983	8.883	9.093	8.928	4.094	5.983	0.982	5.983	6.984	8.983	5.984	6.893	9.092	5.983	3.984	5.983	4.983	4.334	4.958	4.058	3.094
Carci	1.673	5.304	0.598	2.124	3.212	2.111	2.321	2.093	2.093	1.293	2.093	1.092	0.234	1.882	1.321	0.004	1.42	1.003	1.3	1.402	1.22	1.096	2.114	2.091	2.091	1.095	1.23	1.002	1.331	1.096	0.509	0.248
E2F8	1	2	3	4	5	6	7	8	9	10	11	12	13	14	15	16	17	18	19	20	21	22	23	24	25	26	27	28	29	30	31	32
Adj	3.007	3.849	5.68725	4.9831	8.145	3.0849	0.9989	9.3914	8.143	5.42375	8.13124	3.01328	3.082	0.9381	0.98731	5.12421	6.24123	4.2144	9.1241	3.4325	6.2423	6.13124`	3.4125	0.563	1.637	2.391	1.389	1.23	1.209	1.092	0.984	2.983
Carci	1.748	2.398	1.938	2.3984	4.985	6.039	0.734	2.124	3.23	4.983	0.234	1.234	1.092	1.928	2.134	0.472	0.289	0.223	0.901	1	0.973	2.83	1.092	0.974	0.982	10.298	0.999	0.398	9.0191	2.03883	0.283471	0.973165
